# Supplementary material
Source: PubMed Central journal article supplement (PMC3271584)
Supplement: cr2011100x2.pdf [file cr2011100x2.pdf]

## Supplementary information, Figure S2

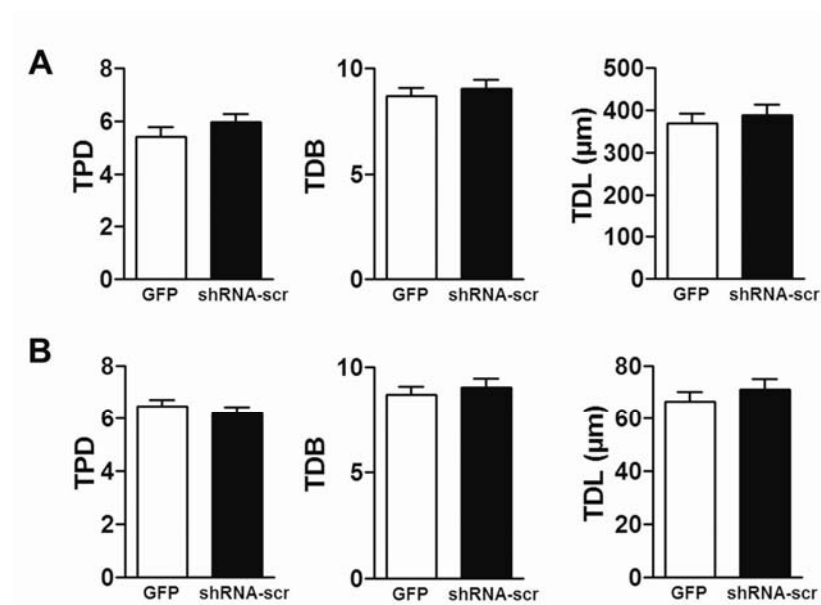

**Figure S2** shRNA-scr has no effect on dendritic arborization. **(A-B)** The dendritic arbors of DIV3 **(A)** and DIV6 **(B)** neurons transfected at DIV0 with shRNA-scr and GFP did not differ from those of neurons transfected with GFP alone. TPD: total number of primary dendrites. TDB: total number of dendrite branch ends. TDL: total dendrite length. Data represent mean  $\pm$  SEM.
