# Supplementary material
Source: PubMed Central journal article supplement (PMC3271584)
Supplement: cr2011100x3.pdf [file cr2011100x3.pdf]

## Supplementary information, Figure S3

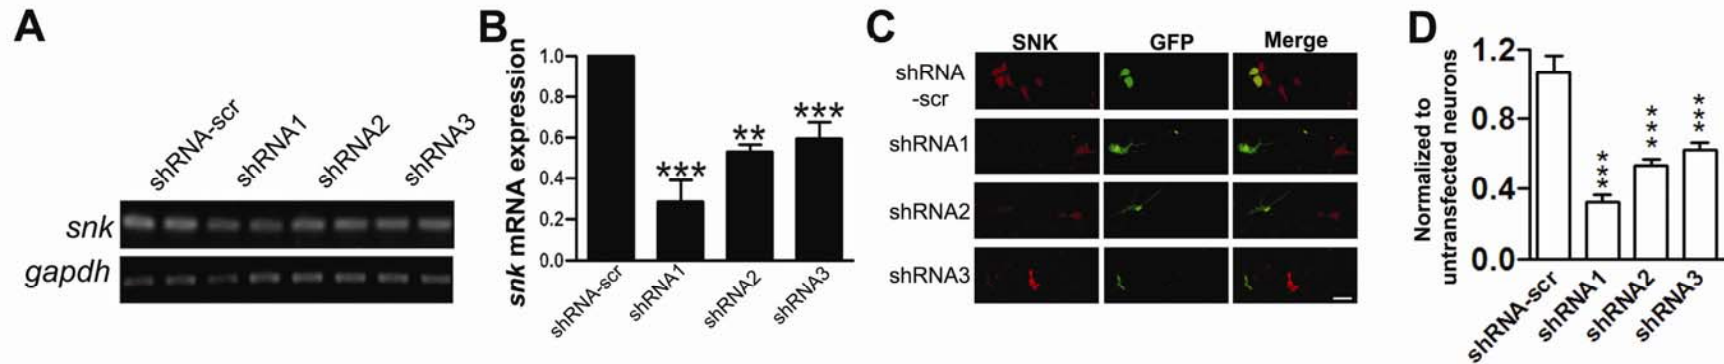

**Figure S3** Knockdown efficiency of SNK shRNA constructs in DIV3 neurons. **(A)** Representative RT-PCR amplification of *snk* in DIV3 neurons transfected with the indicated construct on DIV0. **(B)** Statistical analysis of **A**,  $n \geq 3$  samples. **(C)** Representative anti-SNK immunocytochemical staining of DIV3 neurons transfected with GFP and the indicated construct on DIV0 and treated with MG132 for 18 h prior to fixation. Red: anti-SNK. Green: GFP. Images were acquired under a  $63\times$  oil objective, NA = 1.4. Scale bar, 20  $\mu\text{m}$ . **(D)** Statistical analysis of **C** showing the mean fluorescence intensity of the SNK signal in GFP positive neurons (shRNA expressing neurons) normalized to untransfected control neurons (GFP negative) in the same optical field;  $n \geq 15$  optical fields; \*\*\* $P < 0.001$  compared with shRNA-scr group (ANOVA with post Newman-Keuls test).
