# Supplementary material
Source: PubMed Central journal article supplement (PMC3271584)
Supplement: cr2011100x4.pdf [file cr2011100x4.pdf]

## Supplementary information, Figure S4

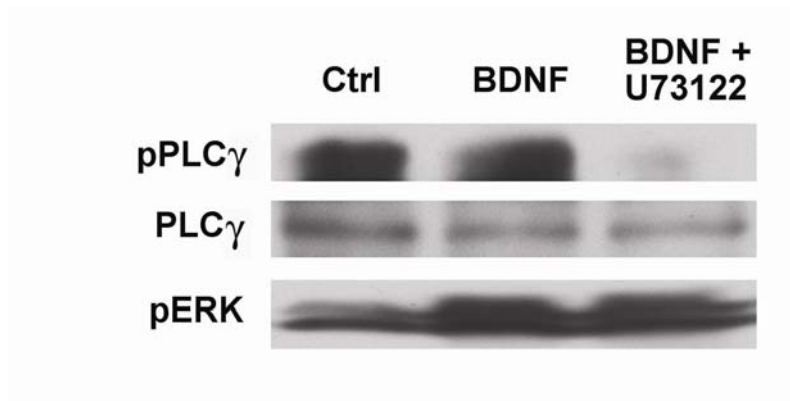

**Figure S4** U73122 blocks PLC $\gamma$  phosphorylation. Western blot of DIV5 neurons showing PLC $\gamma$  and phosphorylated PLC $\gamma$  (pPLC $\gamma$ ) levels in control neurons (treated with vehicle solution) and neurons stimulated with 25 ng/ml BDNF for half an hour with or without a 15 min pretreatment with U73122. pERK was blotted as a positive control for BDNF stimulation.
